# A study of allelic series using transcriptomic phenotypes in a metazoan

David Angeles-Albores<sup>1,2</sup> and Paul W. Sternberg<sup>1,2,\*</sup>

<sup>1</sup>*Division of Biology and Biological Engineering, Caltech, Pasadena, CA, 91125, USA*

<sup>2</sup>*Howard Hughes Medical Institute, Caltech, Pasadena, CA, 91125, USA*

\**Corresponding author. Contact: pws@caltech.edu*

October 28, 2017

Expression profiling holds great promise for genetics because of its ability to measure thousands of genes quantitatively in parallel. Although transcriptomes have recently been used to perform epistasis analyses for pathway reconstruction, there has not been a systematic effort to understand how expression profiles will vary among various mutants of the same gene. Here, we study an allelic series in *C. elegans* consisting of one wild type and two mutant alleles of *mdt-12*, a highly pleiotropic gene whose gene product is a subunit of Mediator complex, which is essential for transcriptional initiation in eukaryotes. We developed a false hit analysis to identify which populations of genes commonly differentially expressed with respect to the wild type are likely the result of statistical artifact. We concluded that expression perturbations caused by these alleles split into four distinct modules called phenotypic classes. To understand the dominance relationship between the two mutant alleles, we developed a dominance analysis for transcriptional data. Dominance analysis of these phenotypic classes support a model where *mdt-12* has multiple functional units that function independently to target the Mediator complex to specific genetic loci.

## Author Summary

Expression profiling is a way to quickly and quantitatively measure the expression level of every gene in an organism. As a result, these profiles could be used as phenotypes with which to perform genetic analyses (i.e., to figure out what genes interact with each other) as well as to dissect the molecular properties of each gene. Before we can perform these analyses, we have to figure out the rules that apply to these measurements. In this paper, we develop new concepts and methods with which to study an allelic series. Briefly, allelic series are an important aspect of genetics because different alleles encode different versions of a gene. By studying these different versions, we can make statements about how function is encoded within the sequence of a gene. We apply our methods to the *mdt-12* gene, which encodes a subunit of the Mediator complex. Though we know it is essential for all transcriptional activity in eukaryotes, we understand very little about how the Mediator complex functions to generate both general and specific phenotypes. The reason for this is the genes that encode these subunits are associated with general sickness and multiple phenotypes when mutated, which makes them challenging to study genetically. We show that transcriptomic phenotypes renders the study of general factors such as *mdt-12* feasible.

## Supplementary Data

The website for the Supplementary Data for this project is still under construction and will be available shortly. All code, data and figures are available upon request.

## 1 Introduction

2 The term ‘allelic series’ refers to the study of alleles  
3 with different phenotypes to understand the molec-  
4 ular properties that this locus controls. Allelic se-  
5 ries are historically important for genetics<sup>1</sup>. In early  
6 pioneering work, McClintock studied a deficiency of  
7 the tail end of chromosome 9 of maize by generat-  
8 ing *trans*-heterozygotes with mutants of various genes  
9 that she knew existed near the end of chromosome 9.  
10 Her work allowed her to infer that the deficiency was  
11 modular, effectively generating a double mutant that  
12 behaved as a single allele but which could participate  
13 phenotypically in two distinct allelic series. From this  
14 study, McClintock inferred that deletions could span  
15 multiple genes, which behaved as independent mod-  
16 ules, and which were identified via complementation  
17 assays. This work set the foundations for later ob-  
18 servations in yeast that showed two mutant alleles  
19 of the same genetic unit, when placed in *trans* to  
20 each other, could complement and generate a wild-  
21 type phenotype<sup>2</sup>. Allelic series have also been used  
22 to study the dose response curve of a phenotype for a  
23 particular gene and to infer null phenotypes from hy-  
24 pomorphs. In *C. elegans*, the *let-23*, *lin-3* and *lin-12*  
25 allelic series stand out as examples<sup>3,4,5</sup>.

26 Over the last decade, biology has moved from  
27 expression measurements of single genes towards  
28 genome-wide measurements. Expression profiling via  
29 RNA-sequencing<sup>6</sup> (RNA-seq) is a popular method  
30 because it enables the simultaneous measurement of  
31 transcript levels for all genes in a genome. These  
32 measurements can now be made on a whole-organism  
33 scale and on single cells<sup>7</sup>. Although initially expres-  
34 sion profiles had a qualitative purpose as descriptive  
35 methods to identify genes that are downstream of a  
36 perturbation, these profiles are now being used as  
37 phenotypes for genetic analysis. As a result, tran-  
38 scriptomes have been successfully used to identify  
39 new cell or organismal states<sup>8,9</sup>. Genetic pathways  
40 have been reconstructed via sequencing cDNA from  
41 single cells<sup>10</sup> or by sequencing transcripts from whole-  
42 organisms<sup>11</sup>. However, to fully characterize a genetic  
43 pathway, it is often necessary to build allelic series to  
44 explore whether independent functional units within  
45 a gene mediate different aspects of the phenotypes  
46 associated with a pathway or gene, or whether the  
47 phenotypes are simply the result of gene dosage.

48 As a proof of principle, we selected a subunit of  
49 the Mediator complex in *C. elegans*, *mdt-12* (pre-  
50 viously known as *dpy-22*<sup>12</sup>), for genetic analysis. We  
51 explored three alleles, including the wild-type allele,  
52 of this highly pleiotropic gene because its biologi-  
53 cal roles are poorly understood. The mutant alle-

les were generated in previous screens<sup>13,14</sup>, where  
they were associated with specific phenotypes in the  
male tail and in the vulva. Mediator is a macro-  
molecular complex that contains approximately 25  
subunits<sup>15</sup> and which globally regulates RNA poly-  
merase II (Pol II)<sup>16,17</sup>. Mediator is a versatile regu-  
lator, a quality often associated with its variable sub-  
unit composition<sup>16</sup>, and it can promote transcription  
as well as inhibit it. The Mediator complex consists  
of four modules: the Head, Middle and Tail modules  
and a CDK-8-associated Kinase Module (CKM). The  
CKM can associate reversibly with Mediator. Cer-  
tain models propose that the CKM functions as a  
molecular switch, which inhibits Pol II activity by  
sterically preventing its interaction with the other  
Mediator modules<sup>18,19</sup>. Other models propose that  
the CKM negatively modulates interactions between  
Mediator and enhancers<sup>20</sup>. In *C. elegans*, the CKM  
consists of CDK-8, MDT-13, CIC-1 and DPY-22<sup>21</sup>.  
Since *dpy-22* is orthologous to the human Mediator  
subunits *MED-12* and *MED-12L*<sup>13</sup>, we will hence-  
forth refer to this gene as *mdt-12*. *mdt-12* has been  
studied in the context of the male tail<sup>13</sup>, where it  
was found to interact with the Wnt pathway. It  
has also been studied in the context of vulval for-  
mation<sup>22</sup>, where it was found to be an inhibitor of  
the Ras pathway. Loss of *mdt-12* is lethal in XO an-  
imals<sup>23,24</sup>, and developmental studies have relied on  
reduction-of-function alleles to understand the role  
of this gene in development. Studies of the male  
tail were carried out using an allele, *dpy-22(bx93)*,  
that generates a truncated DPY-22 protein miss-  
ing its C-terminal 949 amino acids as a result of a  
premature stop codon, Q2549STOP<sup>13</sup>. In spite of  
the premature truncation, animals carrying this al-  
lele grossly appear phenotypically wild-type. In con-  
trast, the allele used to study the role of *mdt-12* in  
the vulva, *dpy-22(sy622)*, is a premature stop codon,  
Q1698STOP, that predicted to remove 1,800 amino  
acids from the C-terminus<sup>14</sup> (see Fig. 1). Animals  
carrying this mutation are severely dumpy (Dpy),  
have egg-laying defects (Egl) and have a low pene-  
trance multivulva (Muv) phenotype. These alleles  
could form a single quantitative series, affecting the  
same sets of target genes but to different degrees,  
in which case the *trans*-heterozygote would exhibit  
a single dosage-dependent phenotype intermediate to  
the two homozygotes. Alternatively, they could form  
a single qualitative series, in which case the *trans*-  
heterozygote should have the same phenotype as the  
homozygote of the *bx93* allele, since this allele en-  
codes the longer protein. These alleles could also  
form a mixed series, in which case multiple separa-  
ble phenotypes would appear that have qualitative or

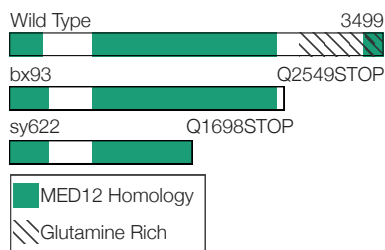

**Figure 1.** The *mdt-12* allelic series, consisting of two amino acid truncations. Diagram of the MDT-12 wild-type protein and the protein product of *bx93* and *sy622* alleles.

quantitative behaviors in the *trans*-heterozygote.

Expression profiles have the potential to facilitate dissection of molecular structures within genes. For the *mdt-12* allelic series, we found that the perturbations caused by the weak loss-of-function allele, *bx93*, are entirely contained within the perturbations caused by the strong loss-of-function allele, *sy622*. Further, we found three phenotypic classes affected by *mdt-12*. For one class, termed the *sy622*-specific class, the *bx93* homozygote, but not the *sy622* homozygote, shows wild-type functionality. In a *trans*-heterozygote of *sy622/bx93* these perturbations are suppressed to wild-type levels from the *sy622* levels, which shows that *bx93* is wild-type dominant for this phenotype. A second class, called the *sy622*-associated class, similarly shows wild-type functionality in the *bx93* homozygote but not in the *sy622* homozygote, yet in the *trans*-heterozygote these perturbations are modulated in a gene-dosage dependent manner. Finally, we identified a third class, called the *bx93*-specific class, which contained genes that were altered in both homozygotes, but which showed an expression level most similar to the *bx93* homozygote, showing that *bx93* has a dominant mutant phenotype for this subset. For each class, we were able to quantitatively measure the dominance level of each allele.

## Results

### Strong and weak loss-of-function alleles of *mdt-12* show different transcriptional profiles

We sequenced in triplicate cDNA synthesized from mRNA extracted from *sy622* homozygotes, *bx93* homozygotes, *trans*-heterozygotes of both alleles and wild-type controls at a depth of 20 million reads per replicate. This allowed us to quantify expression levels of 21,954 protein-coding isoforms. We calculated differential expression with respect to a wild-type

control using a general linear model (see [Methods](#)). Differential expression with respect to the wild-type control for each transcript  $i$  in a genotype  $g$  is measured via a coefficient  $\beta_{g,i}$ , which can be loosely interpreted as the natural logarithm of the fold-change. Positive  $\beta$  coefficients indicate up-regulation with respect to the wild-type, whereas negative coefficients indicate down-regulation. Transcripts were tested for differential expression using a Wald test, and the resulting  $p$ -values were transformed into  $q$ -values that are corrected for multiple hypothesis testing. Transcripts were considered to have differential expression between wild-type and a mutant if the associated  $q$ -value of the  $\beta$  coefficient was less than 0.1. At this threshold, 10% of all differentially expressed genes are expected to be false positive hits.

Using these definitions, we found 481 differentially expressed genes in the *bx93* homozygote transcriptome, and 2,863 differentially expressed genes in the *sy622* homozygote transcriptome (see [Fig. 2](#)).

### Transcriptome profiling of *mdt-12 trans*-heterozygotes

We also sequenced *trans*-heterozygotic animals with genotype *dpy-6(e14) bx93/+ sy622*. This *trans*-heterozygote appears phenotypically wild-type, resembling the *bx93* mutant morphologically<sup>14</sup>. The *trans*-heterozygote transcriptome had 2,214 differentially expressed genes.

### False hit analysis identifies four phenotypic classes

Overlapping three sets of differentially expressed genes from different genotypes can generate at most seven categories. Each of these seven categories could be interpreted biologically if the population is believed to arise from real effects. If these populations are small, however, there is a real chance that they represent statistical noise, and are not biologically meaningful. If that is the case, these populations may consist largely of genes that are mis-classified and belong to a different cluster, in which case they should be re-classified into the most likely cluster, if it can be determined.

We identified three categories of genes that were most likely to be influenced by statistical noise due to their small size. These populations were those that encompassed genes differentially expressed in *bx93* homozygotes and one other genotype, as well as genes that were differentially expressed specifically in *bx93* homozygotes.

194 These three categories stand out as candidates for  
 195 statistical noise not just because of their small size,  
 196 but also because of the extraordinary biological inter-  
 197 pretations required to make sense of them. For exam-  
 198 ple, if there truly is a population of genes that is only  
 199 perturbed in homozygotes of either allele but not in  
 200 the *trans*-heterozygote, then this means that the two  
 201 alleles are somehow intragenically complementing to  
 202 produce wild-type function. Given the molecular nature  
 203 of the mutations, this interpretation is unlikely  
 204 to be correct.

205 To perform a false hit analysis, we imagined an ideal-  
 206 ized scenario where the perturbations in *bx93* ho-  
 207 mozygotes were present in all three genotypes. We also  
 208 imagined that in this scenario the *trans*-heterozygote  
 209 did not exhibit any perturbations not present the  
 210 *sy622* homozygote. In this simplified scenario, we  
 211 could model where false positive and false negative  
 212 hits were most likely to fall (see Fig. 2). Next, we  
 213 present the results of our hit analysis for each pertur-  
 214 bation category.

215 We identified 78 genes that are differentially ex-  
 216 pressed exclusively in *bx93* homozygotes. At a false  
 217 positive rate of 10% (our defined cut-off) we expect  
 218 48 genes to be falsely called as differentially ex-  
 219 pressed in *bx93* homozygotes. The probability that such a  
 220 false positive is also differentially expressed in an-  
 221 other genotype is 20% (4,392 transcripts identified  
 222 between the two other genotypes divided by 21,954  
 223 the total number of transcripts that were successfully  
 224 sequenced). Thus, on average we expect 39 false po-  
 225 sitive hits to be classified into the *bx93*-specific class.  
 226 On average, half of all genes in the *bx93*-specific class  
 227 would be expected to be the result of statistical arti-  
 228 facts. Statistical noise is therefore a major contrib-  
 229 utor towards the existence of this class. Since the  
 230 biological interpretation of this class is unclear and  
 231 requiring extraordinary evidence, we find the most  
 232 parsimonious explanation to be that the *bx93*-specific  
 233 class does not exist.

234 We estimated that statistical noise could account  
 235 for > 80% of the genes that were differentially ex-  
 236 pressed in both *bx93* and *sy622* homozygotes and  
 237 not differentially expressed in the *trans*-heterozygote.  
 238 Further, we estimated that statistical artifacts could  
 239 explain > 80% of the transcripts that were differen-  
 240 tially expressed in the *trans*-heterozygote and *bx93*  
 241 homozygotes but not in *sy622* homozygotes. For  
 242 both of these populations, we estimate that the ma-  
 243 jority of the false hits emerge from false negative re-  
 244 sults. In other words, most of the noise in these po-  
 245 pulations is the result of mis-classification. Finally,  
 246 the biological interpretation of either population is  
 247 implausible given the molecular nature of the alle-

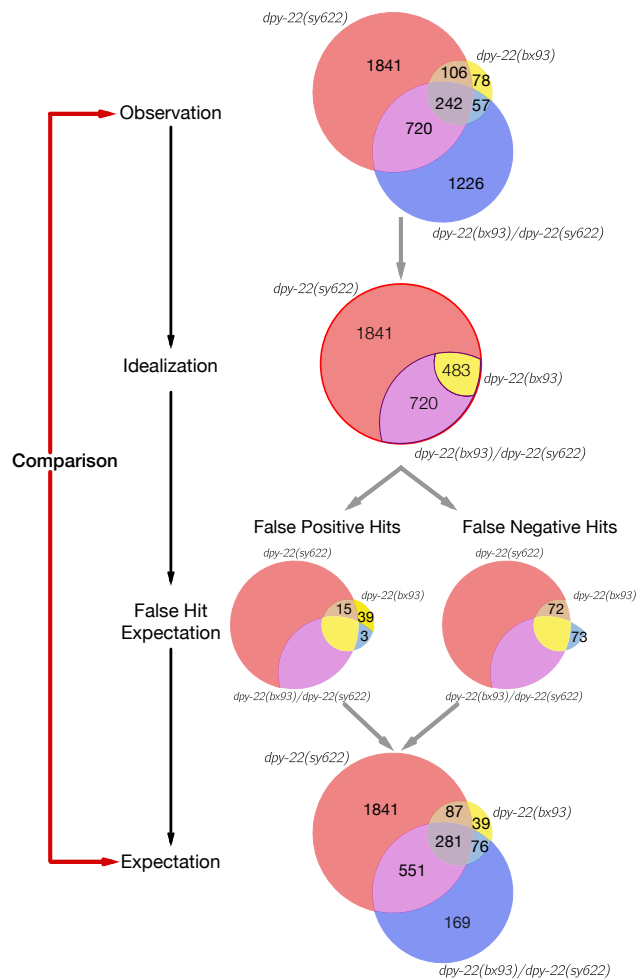

**Figure 2.** False hit analysis. To assess the extent to which statistical artifacts could affect the interpretation of certain intersections, we first idealized the Venn diagram and asked whether false positive and false negative results could distort the diagram back to its original shape. We estimated the false negative rate at 15% and used a false positive rate of 10%. For simplicity, only false hit analysis for *bx93* groups is shown. False hits can explain the existence of a groups of genes that are differentially expressed in *bx93* homozygotes only, in *bx93* homozygotes and *trans*-heterozygotes, and in *bx93* homozygotes and *sy622* homozygotes. Genes that are solely expressed in *bx93* homozygotes are unlikely to exist, whereas genes that are differentially expressed in *bx93* homozygotes and one other genotype are probably misclassified and should be differentially expressed in all genotypes. The *trans*-heterozygote specific class cannot be explained by statistical artifacts.

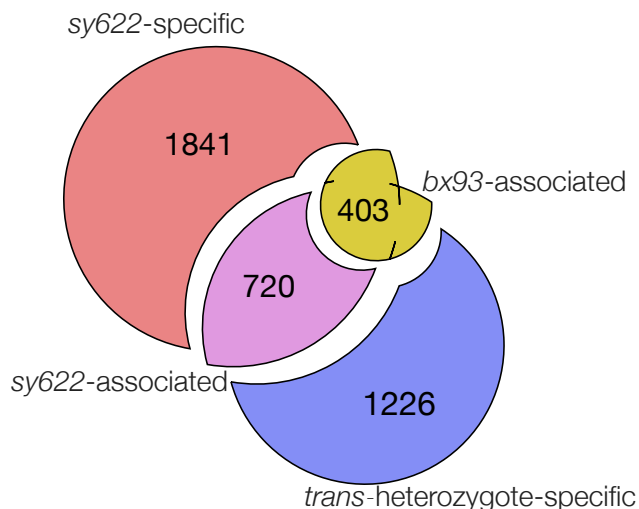

**Figure 3.** Transcripts under the control of *mdt-12* belong to distinct phenotypic classes. Exploded Venn diagram highlighting the four identified phenotypic classes.

248 les. Taken together, a false hit analysis of these two  
249 categories strongly suggests that they contain genes  
250 that have been mis-classified and which most likely  
251 are differentially expressed in all three genotypes.

252 A false hit analysis identified four non-overlapping  
253 phenotypic classes (see Fig. 3). We use the term  
254 allele- or genotype-specific to refer to groups of tran-  
255 scripts that are solely perturbed in a single geno-  
256 type. On the other hand, we use the term allele-  
257 associated to refer to those groups of transcripts that  
258 are perturbed in at least two genotypes. We identi-  
259 fied a *sy622*-associated phenotypic class, which con-  
260 sisted of 720 genes differentially expressed in *sy622*  
261 homozygotes and in *trans*-heterozygotes, but which  
262 were not differentially expressed in *bx93* homozy-  
263 gotes. We also identified a *bx93*-associated pheno-  
264 typic class. Following the argument of the previ-  
265 ous paragraph, this class included all genes that were  
266 differentially expressed in *bx93* homozygotes and at  
267 least one other genotype, since it is likely that of these  
268 genes should actually be differentially expressed in all  
269 genotypes. As a result, this class contains 403 genes.  
270 We also identified a *sy622*-specific phenotypic class  
271 (1,841 genes) and a *trans*-heterozygote-specific phe-  
272 notypic class (1,226 genes). Having identified these  
273 phenotypic classes, we set out to confirm whether  
274 each class actually behaved as an independent phe-  
275 notypic module in an allelic series and whether each  
276 class could be interpreted biologically to shed light  
277 on the functions of *mdt-12*.

## Different phenotypic classes behave dif- 278 ferently in an *sy622* homozygote 279

280 We asked whether these classes had perturbation dis-  
281 tributions distinct from each other within a single  
282 homozygote. Specifically, we wanted to test whether  
283 these sets behaved as randomly selected sets. If this  
284 were the case, then within a single genotype, each  
285 class would be expected to have the same distribution  
286 of perturbations (see Fig. 4). We found that that the  
287  $\beta$  coefficients of isoforms within the *bx93*-associated  
288 phenotype on average had the largest absolute value  
289 (mean: 1.2). The *sy622*-associated phenotype had  
290 a smaller range of perturbations compared to the  
291 *bx93*-associated phenotype (95th percentiles of the  
292 two distributions: 2.9 versus 3.2, respectively), and a  
293 statistically smaller median (0.91 vs 1.2, respectively,  
294  $p < 10^{-6}$ , non-parametric bootstrap). The medians  
295 of the *sy622*-specific and -associated classes were the  
296 same ( $p = 0.15$ ). There are systematic differences  
297 between the behaviors of each class. This rejects the  
298 null hypothesis that the transcripts in each class were  
299 randomly selected.

## Dominance can be quantified in tran- 300 scriptomic phenotypes 301

302 Dominance relationships between alleles are  
303 phenotype-specific. In other words, an allele  
304 can be dominant over another for one phenotype,  
305 yet not for others. An example is the *let-23* allelic  
306 series—nulls of *let-23* are recessive lethal (Let) and  
307 presumably also recessive vulvaless (Vul) relative to  
308 the wild-type allele. The *sy1* allele of *let-23* is dom-  
309 inant viable relative to null alleles, but is recessive  
310 Vul<sup>3</sup> to the wild-type allele. Above, we postulated  
311 that there are four phenotypic classes, three of  
312 which are composed of genes whose expression is  
313 significantly perturbed in the *sy622* homozygote. If  
314 these classes are indeed modular phenotypes, then  
315 the dominance relationships within each class should  
316 be the same from gene to gene. In other words, a  
317 single dominance coefficient should be sufficient to  
318 explain the gene expression in the *trans*-heterozygote  
319 for every gene within a class.

320 To quantify this dominance, we implemented and  
321 maximized a Bayesian model (see [Methods](#)). Briefly,  
322 we asked what the linear combination of  $\beta$  coefficients  
323 from each homozygote would best predict the ob-  
324 served  $\beta$  values of the heterozygote, subject to the  
325 constraint that the coefficients added up to 1 (see  
326 [Dominance analysis](#)). We reasoned that if this was a  
327 modular phenotype controlled by a single functional  
328 unit encoded within the gene of interest, then a plot

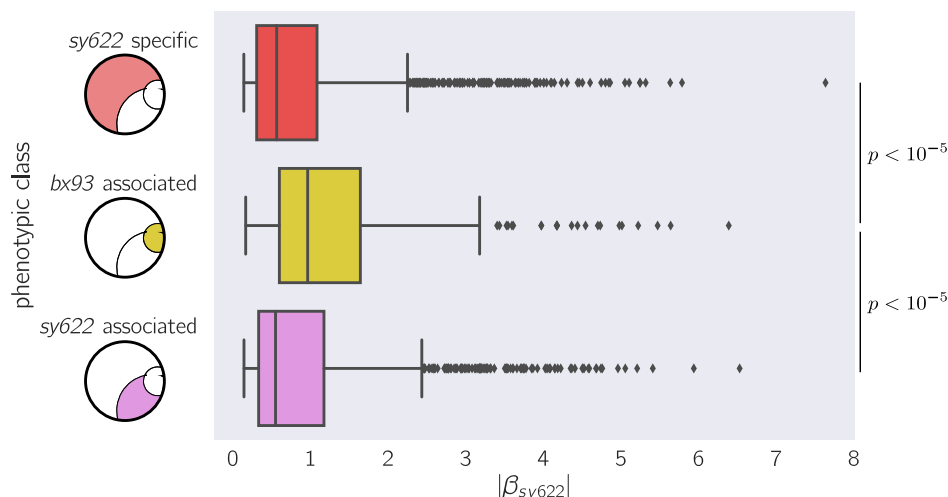

**Figure 4.** Within the *sy622* homozygote mutant, transcripts whose differential expression pattern places them in different phenotypic classes have statistically different distributions. The lines within the boxes show the 25<sup>th</sup>, 50<sup>th</sup>, and 75<sup>th</sup> percentiles. Whiskers show the 0<sup>th</sup> and 100<sup>th</sup> percentiles, with the exception of outliers (diamonds). Diagrams show what genotypes each gene class is expressed in, but the magnitude of the perturbation plotted always corresponds to the *sy622* mutant. The x-axis shows the absolute magnitude of the perturbation plotted for each transcript in *sy622* homozygotes,  $|\beta_{sy622}|$ . The medians of the *sy622*-specific and the *sy622*-associated classes were statistically significantly different from the median of the *bx93*-specific class, as assessed by a non-parametric bootstrap test.

329 of the predicted  $\beta$  values from the optimized model  
 330 against the observed  $\beta$  values of the heterozygote for  
 331 each transcript should show the data falling along a  
 332 line with slope equal to unity. Systematic deviations  
 333 from linear behavior would indicate that the trans-  
 334 scripts plotted are not part of a modular phenotypic  
 335 class controlled by a functional unit.

336 **The *sy622*-specific class expression phenotype**  
 337 **of the *sy622* homozygote is complemented to**  
 338 **wild-type levels by the presence of a *bx93* al-**  
 339 **lele**

340 Since our previous testing showed that the tran-  
 341 script expression of genes in this class was dysregu-  
 342 lated in *sy622* homozygotes, and wild-type in both  
 343 *bx93* homozygotes and *trans*-heterozygotes we can  
 344 conclude that these transcripts are complemented to  
 345 their wild-type levels by the presence of the *bx93* al-  
 346 lele. Applying the Bayesian model yields identical  
 347 results ( $d_{bx93} = 1$ ). Thus, there is a module that has  
 348 wild-type functionality in the *bx93* allele but is par-  
 349 tially or completely deleted in the *sy622* allele. This  
 350 functionality must require protein encoded between  
 351 the amino acid position 1,698 where the *sy622* pro-  
 352 tein product truncates prematurely, and the position  
 353 2,549 where the *bx93* protein product ends.

354 **The *bx93* allele is dominant over the *sy622* for**  
 355 **the *bx93*-associated phenotype**

356 We explored how expression levels of transcripts  
 357 within the *bx93*-associated phenotypic class were con-  
 358 trolled by these two alleles. Transcripts in this class  
 359 are differentially expressed in homozygotes of either  
 360 allele. Moreover, transcripts in this class are more  
 361 perturbed in *sy622* homozygotes than in *bx93* ho-  
 362 mozygotes. This is consistent with a single functional  
 363 unit that is impaired in the *bx93* allele, and even more  
 364 impaired in the *sy622* allele (see Fig. 5).

365 If a single functional unit is being impaired, then  
 366 we would expect these alleles to form a quantitative  
 367 allelic series for this phenotypic class. In a quantita-  
 368 tive series, alleles exhibit semidominance. We quanti-  
 369 fied the dominance coefficient for this class and found  
 370 that the *bx93* allele is largely but not completely  
 371 dominant over the *sy622* allele ( $d_{bx93} = 0.81$ ; see  
 372 Fig. 5). Dominance in the context of an allelic series  
 373 indicates a qualitative allelic series, which is evidence  
 374 that MDT-12 protein produced from the *bx93* allele  
 375 has an intact functional unit that is deleted in pro-  
 376 tein product from the *sy622* allele. Mixed evidence  
 377 for quantitative and qualitative allelic series at this  
 378 phenotypic class precludes a definitive conclusion.

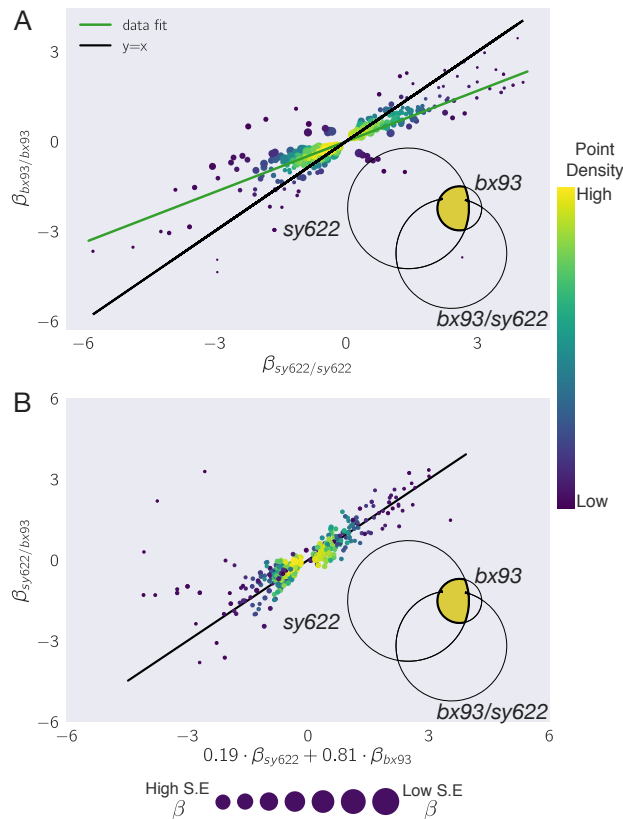

**Figure 5.** The *bx93*-associated class has properties of both quantitative and qualitative allelic series. **A** In *bx93* homozygotes, transcripts within the *bx93*-associated class are less perturbed than in *sy622* homozygotes. The line of best fit (green) is  $\beta_{bx93/bx93} = 0.56 \cdot \beta_{sy622/sy622}$ . **B** In a *trans*-heterozygote, the *bx93* allele is largely dominant over the *sy622* allele for the expression levels of transcripts in the *bx93*-associated class. In the graphs above, densely packed points are colored yellow as a visual aid. The size of the point is inversely proportional to the standard error of the  $\beta$  coefficients.

### The *bx93* allele is semidominant with *sy622* for the *sy622*-associated phenotypic class

We quantified the relative dominance of *bx93* and *sy622* on the expression level of transcripts that belonged to the *sy622*-associated class. We found that both alleles are semidominant ( $d_{bx93} = 0.51$ ). This suggests that there is a structure distributed evenly throughout the gene body starting the first amino acid position and ending before position 2,549. Since the two alleles are semidominant for transcript expression in this class, the functionality encoded in this gene must be dosage-dependent for this model to hold.

### The *sy622*-specific class is strongly enriched for a Dpy transcriptional signature

*bx93* homozygotic animals are almost wild-type, but careful measurements show that they have a slight body length defect causing them to be slightly Dpy, and *sy622* homozygotic animals are known to be severely Dpy<sup>14</sup>, but this phenotype is complemented almost to *bx93* levels when this allele is placed in *trans* to the *sy622* allele. The only class that is fully complemented to wild-type levels is the *sy622*-specific class. Therefore, we hypothesized that the *sy622*-specific class should show a strong transcriptional Dpy signature.

To test this hypothesis, we derived a Dpy signature from two Dpy mutants (*dpy-7* and *dpy-10*, DAA, CPR and PWS *unpublished*) consisting of 628 genes. We used this gene set to look for a transcriptional Dpy signature in each phenotypic class using a hypergeometric probabilistic model (see [Methods](#)). We found that the *sy622*-specific and -associated classes were enriched in genes that are transcriptionally associated with a Dpy phenotype. The *bx93*-associated class also showed significant enrichment (fold-change = 2.2,  $p = 4 \cdot 10^{-10}$ , 68 genes observed). The enrichment was of considerably greater magnitude in the *sy622*-specific class (fold-change enrichment = 3,  $p = 2 \cdot 10^{-40}$ , 167 genes observed) than the enrichment in the *sy622*-associated class (fold-change = 1.9,  $p = 9 \cdot 10^{-9}$ , 82 genes observed) or in the *bx93*-associated class. Correlation analysis showed that a majority of the genes in the *sy622*-specific class were strongly correlated between the expression levels in the Dpy signature and the expression levels in *sy622* homozygotes, while 25% of the genes were anti-correlated (Spearman  $R = 0.42$ ,  $p = 6 \cdot 10^{-15}$ , see Fig. 6). If the anti-correlated values are excluded from the Spearman regression, the statistical value of

430 the regression improves significantly (Spearman  $R =$   
431  $0.94$ ,  $p = 2 \cdot 10^{-108}$ ). Taken together, this suggests  
432 that the *sy622*-specific phenotypic class contains a  
433 transcriptional signature that can be associated with  
434 the morphological Dpy phenotype.

435 We also tested a hypoxia dataset<sup>11</sup>, since *mdt-12*  
436 is not known to be upstream of the *hif-1*-dependent  
437 hypoxia response in *C. elegans*. Enrichment tests re-  
438 vealed that the hypoxia response was significantly  
439 enriched in the *bx93*-associated (fold-change = 2.1,  
440  $p = 10^{-8}$ , 63 genes observed), the *sy622*-associated  
441 (fold-change = 1.9,  $p = 4 \cdot 10^{-8}$ , 78 genes observed)  
442 and the *sy622*-specific classes (fold-change = 2.4,  
443  $p = 9 \cdot 10^{-55}$ , 186 genes observed). However, there  
444 was no correlation between the expression levels of  
445 these genes in *mdt-12* genotypes and the expression  
446 levels expected from the hypoxia response. Although  
447 the hypoxia gene battery can be found in *mdt-12* mu-  
448 tants, these genes are not used to deploy a hypoxia  
449 response, and the animals do not have a hypoxic-  
450 response phenotype.

## 451 Discussion

### 452 Allelic series using transcriptomic phe- 453 notypes can dissect the functional units 454 of a gene

455 We have shown that whole-organism transcriptomic  
456 phenotypes can be analyzed in the context of an alle-  
457 lic series to partition the transcriptomic effects of a  
458 large, pleiotropic gene into separable classes. Anal-  
459 ysis of these modules can inform structure/function  
460 predictions at the molecular level, and enrichment  
461 analysis of each class can be subsequently correlated  
462 with other morphologic or behavioral phenotypes.  
463 This method shows promise for analysing pathways  
464 that have major effects on gene expression in an  
465 organism, and which do not have complex, antag-  
466 onistic tissue-specific effects on expression. Given  
467 the importance of allelic series for fully character-  
468 izing genetic pathways, we are optimistic that this  
469 method will be a useful addition towards making full  
470 use of the potential of these molecular phenotypes.  
471 Specifically, allelic series coupled with false hit anal-  
472 yses show great promise to identify distinct pheno-  
473 typic classes that would be difficult or impossible  
474 to measure using standard methods. The sensitiv-  
475 ity and quantitative nature of transcriptomic pheno-  
476 types makes identification of these phenotypes con-  
477 siderably more feasible. Once the phenotypic classes  
478 have been identified, dominance and enrichment anal-  
479 yses can be performed easily with significant statis-

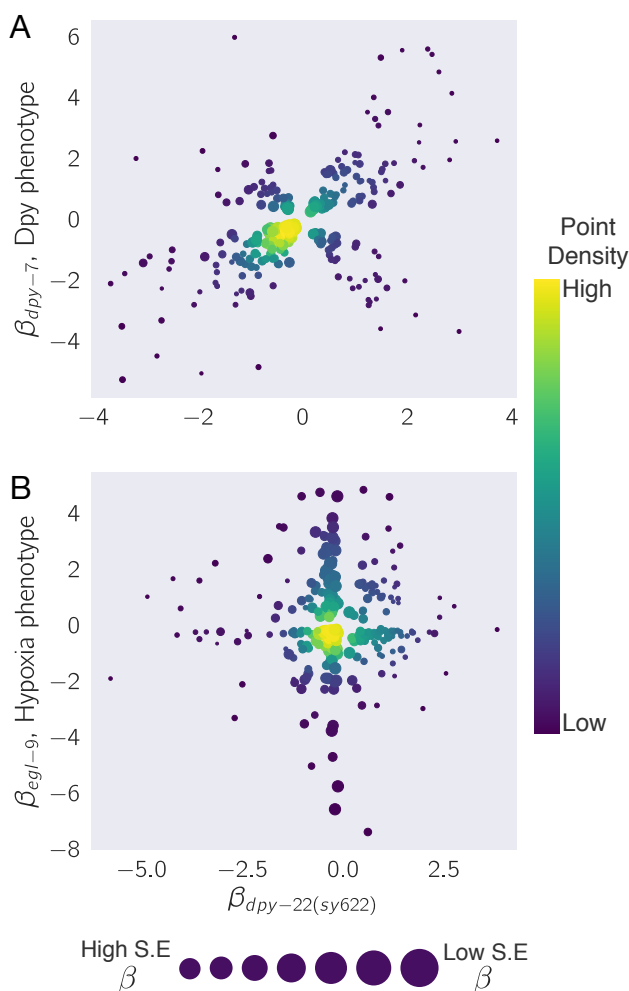

**Figure 6.** *sy622* homozygotes show a transcriptional response associated with the Dpy phenotype. **A** We obtained a set of transcripts associated with the Dpy phenotype from *dpy-7* and *dpy-10* mutants. We identified the transcripts that were differentially expressed in *sy622* homozygotes. Next, we plotted the  $\beta$  values of each transcript in *sy622* homozygotes against the  $\beta$  values in a *dpy-7* mutant. A significant portion of the genes are correlated between the two genotypes, showing that the signature is largely intact. 25% of the genes are anti-correlated. **B** We performed the same analysis using a set of transcripts associated with the *hif-1*-dependent hypoxia response as a negative control. Although *sy622* is enriched for the transcripts that make up this response, there is no correlation between the  $\beta$  values in *sy622* homozygotes and the  $\beta$  values in *egl-9* homozygotes. In the plots, a colormap is used to represent the density of points. The standard error of the mean is inversely proportional to the standard error of  $\beta_{mdt-12(sy622)}$ .



480 tical power. These properties highlight the power of  
481 coupling the genetical properties of *C. elegans* with  
482 next-generation sequencing methods.

## 483 A structure/function diagram of 484 *mdt-12*

485 Our results strongly suggest the existence of various  
486 functional units in *mdt-12* that control distinct phe-  
487 notypic classes (see Fig. 7). The *sy622*-specific class  
488 of transcripts is regulated normally in the presence of  
489 the *bx93* allele, indicating that the mutated protein  
490 product retains wild-type functionality for regulating  
491 these genes. This functionality is decreased or absent  
492 in MDT-12 produced from the *sy622* allele. There-  
493 fore, the functional unit that controls this class, func-  
494 tional unit 1 (FC1), must require sequence between  
495 amino-acid position 1,689 and position 2,549.

496 A similar argument can be made for a functional  
497 unit that controls *sy622*-associated transcripts, func-  
498 tional unit 2 (FC2). These genes are strongly per-  
499 turbed in *sy622* homozygotes and they are also per-  
500 turbed in *bx93/sy622 trans*-heterozygotes, albeit to  
501 a lesser degree. For this argument to hold, however,  
502 the functional unit must work in a dosage-dependent  
503 manner, since the *bx93* allele is semidominant with  
504 the *sy622* allele, and this unit is likely intact in the  
505 protein product made by the *bx93* allele. This is in  
506 contrast to FC1, which is not dosage-dependent.

507 Evidence in favor of a *bx93*-associated functional  
508 unit was mixed. Although dominance analysis sug-  
509 gested that the *bx93* allele was largely dominant over  
510 the *sy622* allele for expression levels of genes in this  
511 class, the expression of these genes deviated from  
512 wild-type levels in both alleles. The latter suggests  
513 that the *bx93*-associated module is perturbed quanti-  
514 tatively in both alleles, whereas dominance analyses  
515 favor an interpretation where the module is present  
516 in one allele but not in the other. One possibil-  
517 ity is that the *bx93*-associated function we observed  
518 is the joint activity of two distinct effectors, func-  
519 tional units 3 and 4 (FC3, FC4, see Fig. 7). In this  
520 model, FC4 loses partial function in the *bx93* allele,  
521 whereas the FC3 retains its complete activity. This  
522 leads to non-wild-type expression levels of the *bx93*-  
523 associated class of transcripts. In the *sy622* allele,  
524 FC4 is further impaired, causing an increase in the  
525 severity of the observable phenotype. A rigorous ex-  
526 amination of this model requires studying alleles that  
527 mutate the region between Q1689 and Q2549 using  
528 homozygotes and *trans*-heterozygotes. Future work  
529 should be able to establish how many modules exist  
530 in total, and how they may interact to drive gene ex-  
531 pression. The phenotypic classes identified here could

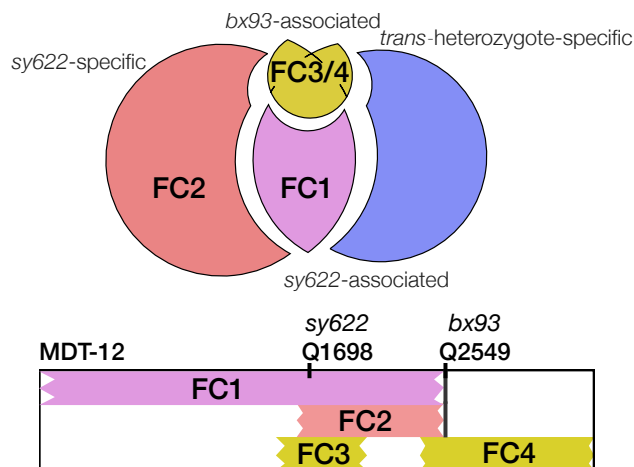

**Figure 7.** The functional units associated with each phenotypic class can be mapped to intragenic locations. The beginning and end positions of these functional units are unknown, so edges are drawn as ragged lines. Thick horizontal lines show the limit where each function could end, if known. We postulate that the *bx93*-associated class is controlled by two functional units, FC3 and FC4, in the tail region of this gene. Some of the modules shown may represent the same structures. Future experiments are required to make a more complete determination of the number and nature of these modules.

532 be compared against transcriptomic signatures from  
533 other transcription factors to identify candidate co-  
534 factors.

## 535 Controlling statistical artifacts

536 Transcriptomic phenotypes generate large amounts of  
537 information that can be used to determine functional  
538 units. However, due to the large number of tests per-  
539 formed, false positive and false negative events oc-  
540 cur frequently enough to create populations of tran-  
541 scripts that have anomalous behaviors. It is necessary  
542 to identify what modules or populations are most at  
543 risk of these events and to what extent these mod-  
544 ules may be polluted by false signals to prevent over-  
545 interpretation. In our experiment, we can estimate  
546 statistical noise in each population. There is a rich  
547 literature in genomics devoted to controlling and es-  
548 timating false positive rates<sup>25,26</sup>, but false negative  
549 rates have largely been ignored because they do not  
550 create spurious signal in simple experimental designs  
551 and because there is ample signal in most RNA-seq  
552 experiments. For allelic series experiments to be suc-  
553 cessful, systematic algorithms to estimate and control  
554 false negative rates, and to identify the popula-  
555 tions most at risk for enrichment of false hits, must

556 be developed, because false negative hits can create  
557 populations of genes that have fantastical biological  
558 behaviors (such as contrived examples of intragenic  
559 complementation or dosage models).

560 We performed a false hit analysis, estimating the  
561 false negative rate at 15%, to identify the clusters  
562 or classes of genes most at risk for statistical noise.  
563 As a general rule, small clusters or classes should be  
564 viewed with skepticism, particularly if the biological  
565 interpretation is complex. To perform a false hit anal-  
566 ysis, we found it crucial is to appropriately idealize  
567 the shape of the Venn diagram. This idealized Venn  
568 diagram can then be “squeezed” with false negative  
569 and false positive rates to observe how it deforms.  
570 The deformed diagram can then be compared with  
571 reality to estimate the contribution of false hits to  
572 the existence of each class.

### 573 **The *trans*-heterozygote specific pheno-** 574 **typic class is not a statistical artifact**

575 In our study, we found a class of transcripts that  
576 were exclusively differentially expressed in *trans*-  
577 heterozygotes. The size of this class, 1226 genes,  
578 means it cannot be a statistical artifact. As a re-  
579 sult, this class must be interpreted either as a leg-  
580 itimate aspect of *mdt-12* biology, possibly reflect-  
581 ing dosage- or tissue-specific effects, or as a strain-  
582 specific artifact. The genotype of the heterozygote  
583 includes a mutation at the *dpy-6* locus which acts as  
584 a cis-marker for the *bx93* mutation. One possibility  
585 is that the *dpy-6* loss-of-function mutation is not re-  
586 cessive for transcriptomic phenotypes and is respon-  
587 sible for the dysregulation of the new genes observed  
588 in the heterozygote. Another possibility is that the  
589 *dpy-6* strain had background mutations that affect  
590 gene expression levels in a complex manner. These  
591 issues could be addressed by re-generating the alle-  
592 les used in this study using genome engineering tools  
593 like CRISPR Cas9, which have few off-target effects  
594 in *C. elegans*<sup>27</sup>. However, even if these issues were  
595 addressed, the biological interpretation of this class  
596 is not straightforward.

597 Phenotypes that are exacerbated or are unique to  
598 *trans*-heterozygotes often indicate that the protein  
599 products of the two alleles are somehow interfering  
600 with each other. This interference can often be the  
601 result of physical interactions such as homodimeriza-  
602 tion, or through a dosage reduction of a toxic prod-  
603 uct<sup>28</sup>. In the case of *mdt-12* orthologs, the protein  
604 products are not known to form oligomers. Instead,  
605 MDT-12 and its orthologs are expected to assemble  
606 in a monomeric manner into the CDK-8 Kinase Mod-  
607 ule.

A dosage model could explain the *trans*-  
heterozygote specific class if the dosage curve is bell-  
shaped. In this model, a switch is only activated  
at a very specific *mdt-12* gene dosage. Beyond this  
dosage, the switch remains off. Although such a  
model explains the data, mechanisms that could gen-  
erate such a dosage curve are not immediately ob-  
vious. One possibility is that this switch is en-  
acted at the level of cell specification or cell divi-  
sion, and that at the appropriate dosage of *mdt-12*,  
two cells that would typically collaborate to form a  
phenotype now act antagonistically, pushing *trans*-  
heterozygotes into a different state from the homozy-  
gotes. If this is the case, whole-organism RNA-seq  
may have limited resolution to identify what tissues  
or cells are being perturbed. Single-cell sequencing  
of *C. elegans* has recently been reported. As this  
technique becomes more widely adopted, and with  
decreasing cost, single-cell profiling of these geno-  
types may provide information that complements the  
whole-organism expression phenotypes, perhaps ex-  
plaining the mysterious origin of this phenotype.

### 630 **Analysis of allelic series using** 631 **transcriptome-wide measurements**

The potential of transcriptomes to perform epistasis  
analyses has been amply demonstrated<sup>10,8</sup>, but their  
potential to perform allelic series analyses has been  
less studied. Though similar in some respects, epista-  
sis analyses and allelic series studies call for different  
methods to solve different problems. To successfully  
perform an allelic series analysis, we must be able to  
identify the number and identity of the phenotypic  
classes, and a dominance analysis must be performed  
for each class to determine whether the alleles inter-  
act qualitatively or quantitatively with each other.  
Additionally, if an allelic series includes more than  
two alleles, the number of experimental outcomes  
and the number of possible outcomes rapidly become  
large.

The general problem of partitioning a set of genes  
into phenotypic classes is a common problem in bioin-  
formatics. This problem has been tackled through  
clustering, matrix-based methods such as PCA or  
non-negative matrix factorization, or through q-  
value-based classification (as we have done here).  
Although these methods can classify genes or tran-  
scripts into clusters, by themselves they cannot ascer-  
tain the probability that any one cluster is real. For  
allelic series studies, this represents a major problem,  
since each cluster can in theory represent a new, inde-  
pendent functional unit within the molecular struc-  
ture of the gene under study. Failure to identify clus-

ters that are the result of statistical artifacts in general will cause researchers to identify inflated numbers of functional units within a molecular structure that appear to behave in a biologically spectacular fashion. We attempted to solve this problem for our series by estimating contributions of statistical noise to each class, although a challenge is that we do not know the false negative rate in our experiment. For our analysis, we exploited the molecular structure of our alleles (nested truncations) to create an idealized version of how gene clusters should behave. We then used our false positive rate and an estimated false negative rate to estimate the signal/noise ratio for each class. This method allows us to identify false classes, and in so doing it also reduces the apparent complexity of the molecular structure of the gene under study.

A challenge for allelic series studies will be the biological interpretation of unexpected classes, such as the *trans*-heterozygote specific class in our analysis. This class is too large to be explained by statistical anomalies. If this class is not an artifact of background or strain construction, the biological interpretation of this class is still not clear. Moreover, even if the biological interpretation of this class were clear, it is not immediately apparent what experimental design could establish the veracity of our interpretation. This problem could perhaps be ameliorated by correlating transcriptomic signatures with more morphologic, behavioral or cellular phenotypes, as has been done in single-cell studies<sup>29</sup>.

## Expression profiling as a method for phenotypic profiling

The possibility of identifying distinct phenotypes using expression profiling is an exciting prospect. With the advent of facile genome editing technologies, the allele generation has become routine. As a result, phenotypification is now the rate-limiting step for genetic analyses. We believe that RNA-seq can be used in conjunction with allelic series to exhaustively enumerate independent phenotypes with minor effort. We should push to sequence allelic diversity to more fully understand genotype-genotype variation.

## Methods

### Strains used

Strains used were N2 wild-type (Bristol), PS4087 *mdt-12(sy622)*, PS4187 *mdt-12(bx93)*, and PS4176 *dpy-6(e14) mdt-12(bx93)/ + mdt-12(sy622)*. All

lines were grown on standard nematode growth media (NGM) Petri plates seeded with OP50 *E. coli* at 20°C<sup>30</sup>.

### Strain synchronization, harvesting and RNA sequencing

All strains were synchronized by bleaching P<sub>0</sub>'s into virgin S. basal (no cholesterol or ethanol added) for 8–12 hours. Arrested L1 larvae were placed in NGM plates seeded with OP50 at 20°C and allowed to grow to the young adult stage (as assessed by vulval morphology and lack of embryos). RNA extraction was performed as described in<sup>11</sup> and sequenced using a previously described protocol<sup>8</sup>.

### Read pseudo-alignment and differential expression

Reads were pseudo-aligned to the *C. elegans* genome (WBcel235) using Kallisto<sup>31</sup>, using 200 bootstraps and with the sequence bias (`--seqBias`) flag. The fragment size for all libraries was set to 200 and the standard deviation to 40. Quality control was performed on a subset of the reads using FastQC, RNAseqQC, BowTie and MultiQC<sup>32,33,34,35</sup>. All libraries had good quality scores.

Differential expression analysis was performed using Sleuth<sup>36</sup>. Briefly, we used a general linear model to identify genes that were differentially expressed between wild-type and mutant libraries. To increase our statistical power, we pooled wild-type replicates from other published and unpublished analysis. All wild-type replicates were collected at the same stage (young adult). In total, we had 10 wild-type replicates from 4 different batches, which heightened our statistical power. Batch effects were smaller than between-genotype effects, as assessed by principal component analysis (PCA), except when switching between samples constructed by different library methods. Wild-type samples constructed using the same library method clustered together and away from all other mutant samples. However, clustering wild-type samples by themselves revealed that the samples clusters correlated with the person who collected them. Therefore, we added batch correction terms to our model to account for batch effects from library construction as well as from the person who collected the samples.

### Non-parametric bootstrap

We performed non-parametric bootstrap testing to identify whether two distributions had the same

756 mean. Briefly, the two datasets were mixed, and  
757 samples were selected at random with replacement  
758 from the mixed population into two new datasets.  
759 We calculated the difference in the means of these  
760 new datasets. We iterated this process  $10^6$  times. To  
761 calculate a  $p$ -value that the null hypothesis is true,  
762 we identified the number of times a difference in the  
763 means of the simulated populations was greater than  
764 or equal to the observed difference in the means of the  
765 real population. We divided this result by  $10^6$  to com-  
766 plete the calculation for a  $p$ -value. If an event where  
767 the difference in the simulated means was greater  
768 than the observed difference in the means was not  
769 observed, we reported the  $p$ -value as  $p < 10^{-6}$ . Oth-  
770 erwise, we reported the exact  $p$ -value. We chose to  
771 reject the null hypothesis that the means of the two  
772 datasets are equal to each other if  $p < 0.05$ .

### 773 Dominance analysis

We modeled allelic dominance as a weighted average of allelic activity. Briefly, our model proposed that  $\beta$  coefficients of the heterozygote,  $\beta_{a/b,i,\text{Pred}}$ , could be modeled as a linear combination of the coefficients of each homozygote:

$$\beta_{a/b,i,\text{Pred}}(d_a) = d_a \cdot \beta_{a/a,i} + (1 - d_a) \cdot \beta_{b/b,i}, \quad (1)$$

774 where  $\beta_{k/k,i}$  refers to the  $\beta$  value of the  $i$ th isoform in  
775 a genotype  $k/k$ , and  $d_a$  is the dominance coefficient  
776 for allele  $a$ .

To find the parameters  $d_a$  that maximized the probability of observing the data, we found the parameter,  $d_a$ , that maximized the equation:

$$P(d_a|D, H, I) \propto \prod_{i \in S} \exp - \frac{(\beta_{a/b,i,\text{Obs}} - \beta_{a/b,i,\text{Pred}}(d_a))^2}{2\sigma_i^2} \quad (2)$$

777 where  $\beta_{a/b,i,\text{Obs}}$  was the coefficient associated with  
778 the  $i$ th isoform in the *trans*-het  $a/b$  and  $\sigma_i$  was  
779 the standard error of the  $i$ th isoform in the *trans*-  
780 heterozygote samples as output by Kallisto.  $S$  is the  
781 set of isoforms that participate in the regression (see  
782 main text). This equation describes a linear regres-  
783 sion which was solved numerically.

### 784 Code

785 All code was written in Jupyter notebooks<sup>37</sup> using  
786 the Python programming language. The Numpy,  
787 pandas and scipy libraries were used for computa-  
788 tion<sup>38,39,40</sup> and the matplotlib and seaborn libraries  
789 were used for data visualization<sup>41,42</sup>. Enrichment  
790 analyses were performed using the WormBase Enrich-  
791 ment Suite<sup>43</sup>. For all enrichment analyses, a  $q$ -value

of less than  $10^{-3}$  was considered statistically signif- 792  
icant. For gene ontology enrichment analysis, terms 793  
were considered statistically significant only if they 794  
also showed an enrichment fold-change greater than 795  
2. 796

## Acknowledgements 797

This work was supported by HHMI with whom PWS 798  
was an investigator, by the Millard and Muriel Ja- 799  
cobs Genetics and Genomics Laboratory at California 800  
Institute of Technology, and by the NIH grant U41 801  
HG002223. This article would not be possible with- 802  
out help from Dr. Igor Antoshechkin and Dr. Vijaya 803  
Kumar who performed the library preparation and 804  
sequencing. We would like to thank Carmie Puck- 805  
ett Robinson for access to the unpublished Dpy tran- 806  
scriptional signature. Han Wang, Hillel Schwartz, 807  
Erich Schwarz and Porfirio Quintero provided valu- 808  
able input throughout the project. 809

## References 810

- 811 McClintock, B. THE RELATION OF HO- 812  
MOZYGOUS DEFICIENCIES TO MUTA- 813  
TIONS AND ALLELIC SERIES IN MAIZE. 814  
*Genetics* **29**, 478–502 (1944).
- 815 FINCHAM, J. R. S. & PATEMAN, J. A. For- 816  
mation of an Enzyme through Complementary 817  
Action of Mutant ‘Alleles’ in Separate Nuclei in 818  
a Heterocaryon. *Nature* **179**, 741–742 (1957).
- 819 Aroian, R. V. & Sternberg, P. W. Multiple 820  
functions of let-23, a *Caenorhabditis elegans* 821  
receptor tyrosine kinase gene required for vul- 822  
val induction. *Genetics* **128**, 251–67 (1991).
- 823 Ferguson, E. & Horvitz, H. R. Identification 824  
and characterization of 22 genes that affect the 825  
vulval cell lineages of *Caenorhabditis elegans*. 826  
*Genetics* **110**, 17–72 (1985).
- 827 Greenwald, I. S., Sternberg, P. W. & Robert 828  
Horvitz, H. The lin-12 locus specifies cell fates 829  
in *caenorhabditis elegans*. *Cell* **34**, 435–444 830  
(1983).
- 831 Mortazavi, A., Williams, B. A., McCue, K., 832  
Schaeffer, L. & Wold, B. Mapping and quanti- 833  
fying mammalian transcriptomes by RNA-Seq. 834  
*Nature Methods* **5**, 621–628 (2008).
- 835 Tang, F. *et al.* mRNA-Seq whole- 836  
transcriptome analysis of a single cell. 837  
*Nature Methods* **6**, 377–382 (2009).

- 838 8. Angeles-Albores, D. *et al.* The Caenorhabditis elegans Female State: Decoupling the Trans-  
839 scriptomic Effects of Aging and Sperm-Status. *G3: Genes, Genomes, Genetics* (2017).  
840  
841
- 842 9. Villani, A.-C. *et al.* Single-cell RNA-seq re-  
843 veals new types of human blood dendritic cells,  
844 monocytes, and progenitors. *Science* **356**,  
845 eaah4573 (2017).
- 846 10. Dixit, A. *et al.* Perturb-Seq: Dissecting Molec-  
847 ular Circuits with Scalable Single-Cell RNA  
848 Profiling of Pooled Genetic Screens. *Cell* **167**,  
849 1853–1866.e17 (2016).
- 850 11. Angeles Albores, D., Puckett Robinson, C.,  
851 Williams, B. A., Wold, B. J. & Sternberg,  
852 P. W. Reconstructing a metazoan genetic path-  
853 way with transcriptome-wide epistasis mea-  
854 surements. *bioRxiv* (2017).
- 855 12. Bourbon, H.-M. *et al.* A Unified Nomencla-  
856 ture for Protein Subunits of Mediator Com-  
857 plexes Linking Transcriptional Regulators to  
858 RNA Polymerase II. *Molecular Cell* **14**, 553–  
859 557 (2004).
- 860 13. Zhang, H. & Emmons, S. W. A *C. elegans*  
861 mediator protein confers regulatory selectivity  
862 on lineage-specific expression of a transcription  
863 factor gene. *Genes and Development* **14**, 2161–  
864 2172 (2000).
- 865 14. Moghal, N. A component of the tran-  
866 scriptional mediator complex inhibits RAS-  
867 dependent vulval fate specification in *C. ele-*  
868 *gans*. *Development* **130**, 57–69 (2003).
- 869 15. Jeronimo, C. & Robert, F. The Mediator Com-  
870 plex: At the Nexus of RNA Polymerase II  
871 Transcription (2017).
- 872 16. Allen, B. L. & Taatjes, D. J. The Mediator  
873 complex: a central integrator of transcription.  
874 *Nature reviews. Molecular cell biology* **16**, 155–  
875 166 (2015).
- 876 17. Takagi, Y. & Kornberg, R. D. Mediator as a  
877 general transcription factor. *The Journal of*  
878 *biological chemistry* **281**, 80–9 (2006).
- 879 18. Knuesel, M. T., Meyer, K. D., Bernecky, C. &  
880 Taatjes, D. J. The human CDK8 subcomplex  
881 is a molecular switch that controls Mediator  
882 coactivator function. *Genes & development* **23**,  
883 439–51 (2009).
- 884 19. Elmlund, H. *et al.* The cyclin-dependent ki-  
885 nase 8 module sterically blocks Mediator in-  
886 teractions with RNA polymerase II. *Proceed-*  
887 *ings of the National Academy of Sciences of*  
888 *the United States of America* **103**, 15788–93  
889 (2006).
- 890 20. van de Peppel, J. *et al.* Mediator Expres-  
891 sion Profiling Epistasis Reveals a Signal Tran-  
892 sduction Pathway with Antagonistic Submod-  
893 ules and Highly Specific Downstream Targets.  
894 *Molecular Cell* **19**, 511–522 (2005).
- 895 21. Grants, J. M., Goh, G. Y. S. & Taubert, S. The  
896 Mediator complex of *Caenorhabditis elegans*:  
897 insights into the developmental and physiolog-  
898 ical roles of a conserved transcriptional coreg-  
899 ulator. *Nucleic acids research* **43**, 2442–53  
900 (2015).
- 901 22. Moghal, N. & Sternberg, P. W. A compo-  
902 nent of the transcriptional mediator complex  
903 inhibits RAS-dependent vulval fate specifica-  
904 tion in *C. elegans*. *Development* **130**, 57–69  
905 (2003).
- 906 23. Hodgkin, J., Horvitz, H. R. & Brenner,  
907 S. NONDISJUNCTION MUTANTS OF  
908 THE NEMATODE CAENORHABDITIS EL-  
909 EGANS. *Genetics* **91** (1979).
- 910 24. Meneely, P. M. & Wood, W. B. Genetic Analy-  
911 sis of X-Chromosome Dosage Compensation in  
912 *Caenorhabditis elegans*. *Genetics* **117** (1987).
- 913 25. Storey, J. D. & Tibshirani, R. Statistical signif-  
914 icance for genomewide studies. *Proceedings of*  
915 *the National Academy of Sciences of the United*  
916 *States of America* **100**, 9440–5 (2003).
- 917 26. Benjamini, Y. & Hochberg, Y. Controlling the  
918 False Discovery Rate: A Practical and Power-  
919 ful Approach to Multiple Testing (1995).
- 920 27. Chiu, H., Schwartz, H. T., Antoshechkin, I. &  
921 Sternberg, P. W. Transgene-free genome edit-  
922 ing in *Caenorhabditis elegans* using CRISPR-  
923 Cas.
- 924 28. Yook, K. Complementation. *WormBook*  
925 (2005).
- 926 29. Lane, K. *et al.* Measuring Signaling and RNA-  
927 Seq in the Same Cell Links Gene Expression to  
928 Dynamic Patterns of NF- $\kappa$ B Activation. *Cell*  
929 *Systems* **4**, 458–469.e5 (2017).

- 
- 930 30. Brenner, S. The Genetics of CAENORHAB- 976  
931 DITIS ELEGANS. *Genetics* **77**, 71–94 (1974). 977
- 932 31. Bray, N. L., Pimentel, H. J., Melsted, P. & 978  
933 Pachter, L. Near-optimal probabilistic RNA- 979  
934 seq quantification. *Nature biotechnology* **34**,  
935 525–7 (2016).
- 936 32. Andrews, S. FastQC: A quality control tool for  
937 high throughput sequence data (2010).
- 938 33. Deluca, D. S. *et al.* RNA-SeQC: RNA-seq met-  
939 rics for quality control and process optimiza-  
940 tion. *Bioinformatics* **28**, 1530–1532 (2012).
- 941 34. Langmead, B., Trapnell, C., Pop, M.  
942 & Salzberg, S. L. Bowtie: An ul-  
943 trafast memory-efficient short read aligner.  
944 [<http://bowtie.cbcb.umd.edu/>]. *Genome biol-*  
945 *ogy* R25 (2009).
- 946 35. Ewels, P., Magnusson, M., Lundin, S. & Käll-  
947 er, M. MultiQC: Summarize analysis results for  
948 multiple tools and samples in a single report.  
949 *Bioinformatics* **32**, 3047–3048 (2016).
- 950 36. Pimentel, H., Bray, N. L., Puente, S., Mel-  
951 sted, P. & Pachter, L. Differential analysis  
952 of RNA-seq incorporating quantification un-  
953 certainty. *brief communications nature meth-*  
954 *ods* **14** (2017).
- 955 37. Pérez, F. & Granger, B. IPython: A System  
956 for Interactive Scientific Computing Python:  
957 An Open and General- Purpose Environment.  
958 *Computing in Science and Engineering* **9**, 21–  
959 29 (2007).
- 960 38. Van Der Walt, S., Colbert, S. C. & Varoquaux,  
961 G. The NumPy array: A structure for efficient  
962 numerical computation. *Computing in Science*  
963 *and Engineering* **13**, 22–30 (2011).
- 964 39. McKinney, W. pandas: a Foundational  
965 Python Library for Data Analysis and Statis-  
966 tics. *Python for High Performance and Scien-*  
967 *tific Computing* 1–9 (2011).
- 968 40. Oliphant, T. E. SciPy: Open source scientific  
969 tools for Python. *Computing in Science and*  
970 *Engineering* **9**, 10–20 (2007).
- 971 41. Hunter, J. D. Matplotlib: A 2D graphics envi-  
972 ronment. *Computing in Science and Engineer-*  
973 *ing* **9**, 99–104 (2007).
- 974 42. Waskom, M. *et al.* seaborn: v0.7.0 (January  
975 2016) (2016).
-
